# Supplementary material for: ATF3 Positively Regulates Antibacterial Immunity by Modulating Macrophage Killing and Migration Functions
Source: PubMed Central journal article supplement (PMC8965742; doi:10.3389/fimmu.2022.839502), 2022-03-16
Supplement: DataSheet_1.pdf [file DataSheet_1.pdf]

SUPPLEMENTARY FIGURES AND TABLE

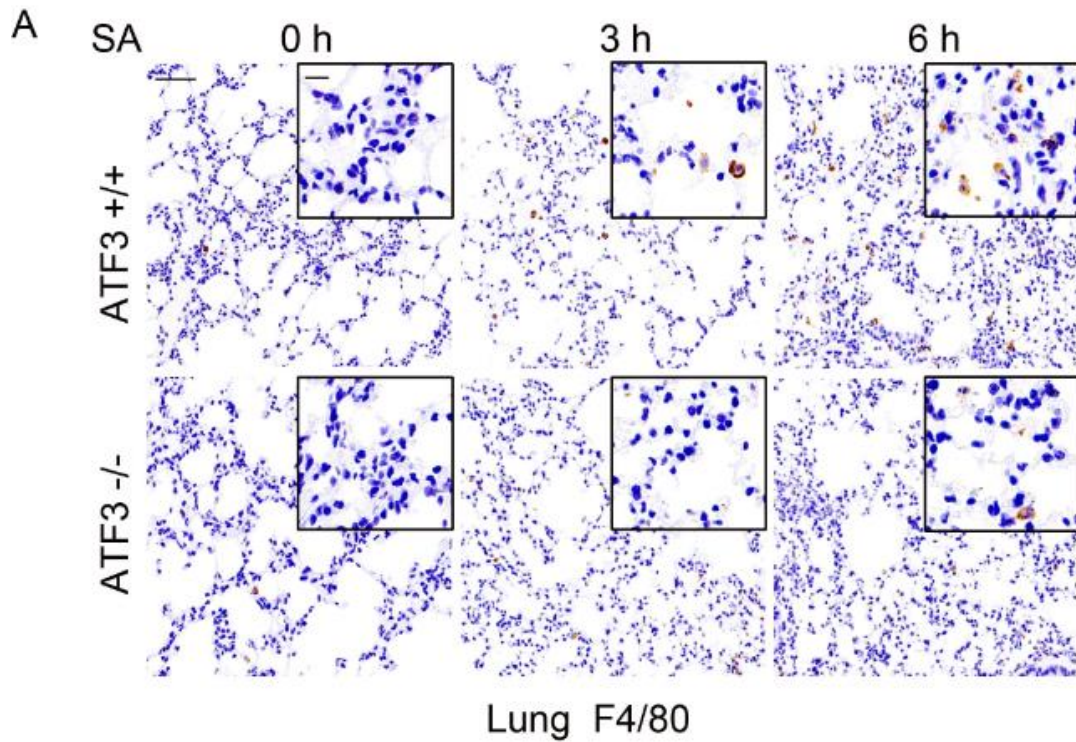

**Supplementary Fig. 1**

(A) Representative images of WT and ATF3 KO mice lung tissues were assessed for macrophage (F4/80) after *S. aureus* infection for 0,3, or 6 h.

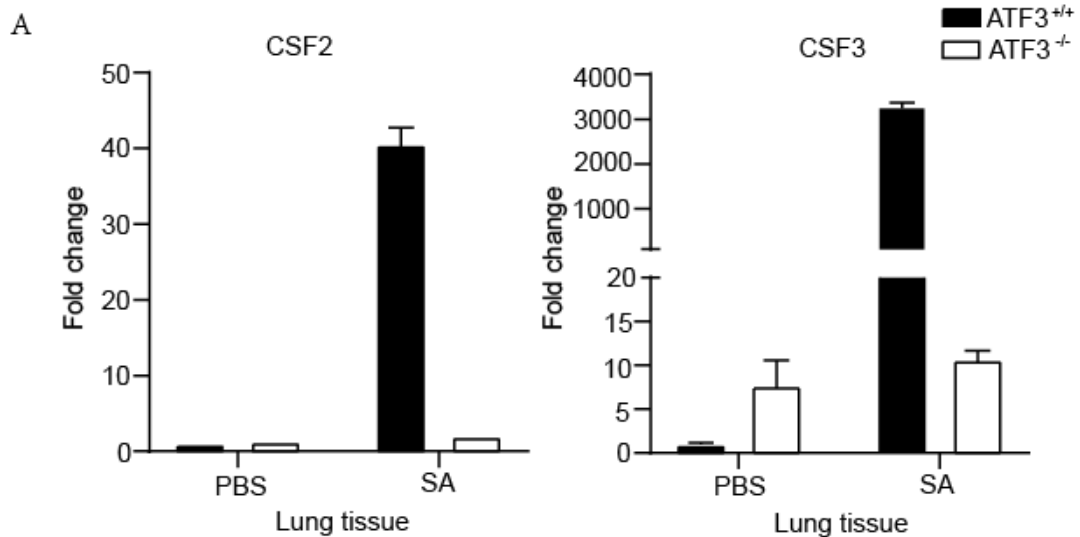

**Supplementary Fig. 2**

(A) WT and ATF3 KO mice were infected with *S. aureus* ( $5 \times 10^7$  CFU/mouse) and then euthanized at 6 h and the expression level of lung factors such as CSF2 and CSF3 in lung tissue were detected using quantitative PCR (qPCR).

Supplementary Fig. 3 | Uncropped western blot images of the indicated Figures.

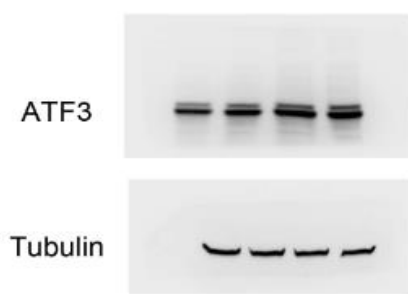

Figure 4A

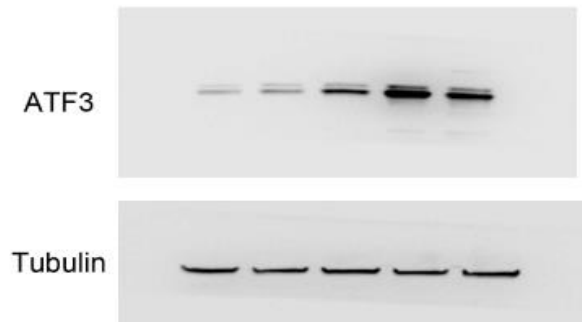

Figure 4B

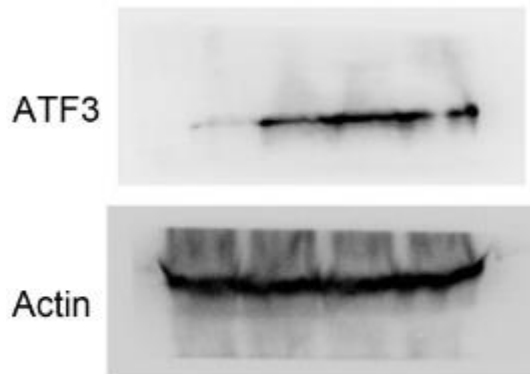

Figure 4C

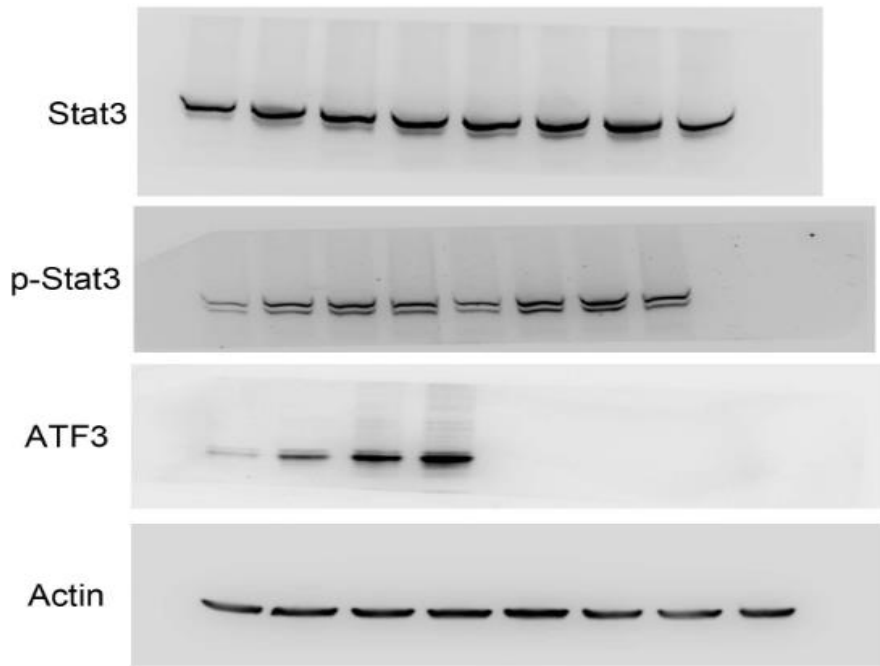

Figure 5A

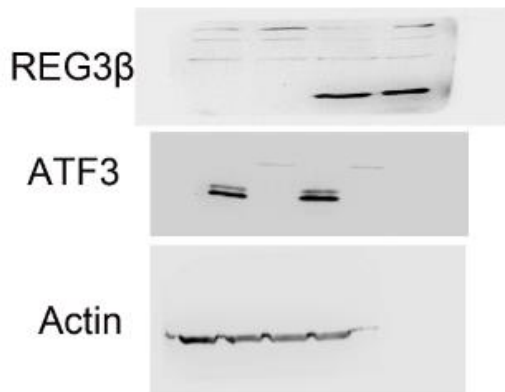

Figure 6D

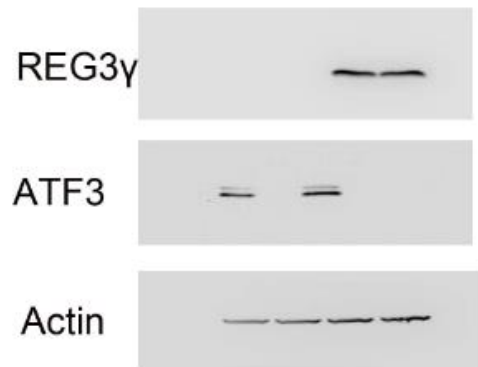

Figure 6E

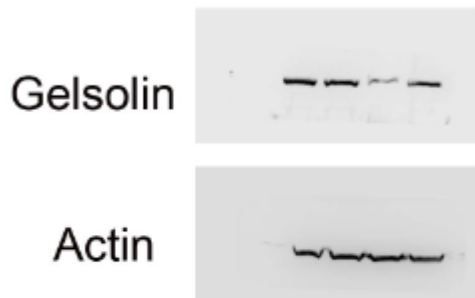

Figure 7D

**Supplementary Table 1. Primers used for qPCR**

| Name             | Primer sequence (5'-3')    |
|------------------|----------------------------|
| Socs3-F          | GGACCAAGAACCTACGCATCCA     |
| Socs3-R          | CACCAGCTTGAGTACACAGTCG     |
| CXCL1-F          | CGCTTCTCTGTGCAGCGCTGCT     |
| CXCL1-R          | CAAGCCTCGCGACCATTCTTGA     |
| CXCL2-F          | TCCAGAGCTTGAGTGTGACG       |
| CXCL2-R          | TCCAGGTCAGTTAGCCTTGC       |
| S100A8-F         | TGTCCTCAGTTTGTGCAGAATATAAA |
| S100A8-R         | TCACCATCGCAAGGAACTCC       |
| S100a9-F         | AAAGGCTGTGGGAAGTAATTAAGAG  |
| S100a9-R         | GCCATTGAGTAAGCCATTCCC      |
| Il10-F           | ATGCTGCCTGCTCTTACTGACTG    |
| Il10-R           | CCCAAGTAACCCTTAAAGTCCTGC   |
| IL18-F           | ACCTCCAGCATCAGGACAAAG      |
| IL18-R           | TGTACAGTGAAGTCGGCCAAAG     |
| IL-33-F          | TCCAACCTCCAAGATTTCCTCCG    |
| IL-33-R          | CATGCAGTAGACATGGCAGAA      |
| Ccl2-F           | TTAAAAACCTGGATCGGAACCAA    |
| Ccl2-R           | GCATTAGCTTCAGATTTACGGGT    |
| Reg3 $\alpha$ -F | GGCACCGAGCCCAATG           |
| Reg3 $\alpha$ -R | GGATTTCTCTCCCATGCAAAGT     |
| Reg3 $\beta$ -F  | ATGGCTCCTACTGCTATGCC       |
| Reg3 $\beta$ -R  | GTGTCCTCCAGGCCTCTTT        |
| Reg3 $\gamma$ -F | CGTGCCTATGGCTCCTATTGCT     |
| Reg3 $\gamma$ -R | TTCAGCGCCACTGAGCACAGAC     |
| Reg3 $\delta$ -F | ACCACAGACCTGGGCTAATG       |
| Reg3 $\delta$ -R | AGTCCAATCCAGATGTATGGGAA    |
| IL17a-F          | TTTAACTCCCTTGCGCAGAAA      |
| IL17a-R          | CTTCCCTCCGCATTGACAC        |
| IL-22-F          | ATGAGTTTTTCCCTTATGGGGAC    |
| IL-22-R          | GCTGGAAGTTGGACACCTCAA      |
| IL-23-F          | CAGCAGCTCTCTCGGAAT         |
| IL-23-R          | ACAACCATCTTCACACTGGATACG   |
| Gelsolin-F       | CAAAGTCGGGTGTCTGAGGC       |
| Gelsolin-R       | CAGGCACCAGGTCAAACCTTCTCC   |
| 18S rRNA-F       | GGCTGTATTCCCCTCCATCG       |
| 18S rRNA-R       | CCAGTTGGTAACAATGCCATGT     |
| $\beta$ -actin-F | CTCATGAAGATCCTGACCGAG      |
| $\beta$ -actin-R | AGTCTAGAGCAACATAGCACAG     |

|        |                         |
|--------|-------------------------|
| CSF2-F | GGCCTTGGAAGCATGTAGAGG   |
| CSF2-R | GGAGAACTCGTTAGAGACGACTT |
| CSF3-F | CTCAACTTTCTGCCCAGAGG    |
| CSF3-R | TAGGTGGCACACAACACTGCTC  |

**Supplementary Table 2. Primer pairs used for ChIP**

| Primer pairs                  | Sequence                |
|-------------------------------|-------------------------|
| Promo-Reg3 $\beta$ -forward   | GTTAACCCCATATACTCCTAGG  |
| Promo-Reg3 $\beta$ -reverse   | ATAATCATGCTACAATCCACAG  |
| Reg3 $\beta$ -Cont- forward   | CAGGAACACCTTGAGCATCAATT |
| Reg3 $\beta$ -Cont- reverse   | AAGTGGCCTCCTCCTATAGCCA  |
| Promo-Reg3 $\gamma$ -forward  | TAACCTCATGAACACAAGTGTTG |
| Promo-Reg3 $\gamma$ -reverse  | ATTCTGAATTGTTTACTTGATAT |
| Promo-Reg3 $\gamma$ -forward  | TCAAATCATTTTAGCCTTGCT   |
| Promo-Reg3 $\gamma$ -reverse  | TTCACGTTTCACATTAGAATG   |
| Reg3 $\gamma$ -Cont- forward  | GTATATTACATAGTGGGATTCA  |
| Reg3 $\gamma$ - Cont- reverse | AAGATTTCTAAGAGGAAAGTAAT |
